# Supplementary material for: Vertical Ionosphere Delay Estimation using Zero Difference GPS Phase Observation
Source: Copernicus journal article supplement (doi:10.5194/angeo-2018-113), 2018-10-25
Supplement: Supplementary file [file angeo-2018-113-AC1-supplement.pdf]

## Replies to reviewer's comments

### Comment to editor and reviewer

The Authors are grateful to the editor and would like to thank the reviewer very much for his important comments that helped us to improve the original manuscript. We have responded to all comments and have revised the paper in light of them. Details of our responses to each comment are shown below.

#### 1- Major:

| No. | Reviewer' comments                                                                                                                                                                                                                                                                                          | Authors' Responses                                                                                                                                                                                                                                                                                                                                                                                                                                                                                                                                                                                                                                                                                                                                                                                                                        |
|-----|-------------------------------------------------------------------------------------------------------------------------------------------------------------------------------------------------------------------------------------------------------------------------------------------------------------|-------------------------------------------------------------------------------------------------------------------------------------------------------------------------------------------------------------------------------------------------------------------------------------------------------------------------------------------------------------------------------------------------------------------------------------------------------------------------------------------------------------------------------------------------------------------------------------------------------------------------------------------------------------------------------------------------------------------------------------------------------------------------------------------------------------------------------------------|
| 1   | It is reported that the developed proposed procedure may be better than GAPS because it can estimate the ionospheric delays each thirty seconds whereas GAPS estimate the ionospheric delays each ten minutes. However, I do not recommend the publication of their manuscript for the reasons given below. | <p>The publication of this manuscript aims to the following:</p> <ol style="list-style-type: none"><li>1- Studying the effect of ionosphere layer on GPS observations by introducing a MATLAB based software for GPS users capable on estimating the vertical ionospheric delay for single GPS receivers.</li><li>2- Investigating the performance of this software to be developed on real ground-based GPS observations by comparing its results with a well-known software "GAPS".</li></ol> <p>This new software provides results of ionospheric delay every thirty seconds. This time interval is a very reliable representation of the ionospheric effect on GPS observations. On the other hand, GAPS software provides these results every ten minutes. Thus, VIDE program can be considered more precise than GAPS software.</p> |

|   |                                                                                                                                                                                                                                                                                                |                                                                                                                                                                                                                                                                                                                                                                                                                                                                                                                                                                                                                                                                                                                                                                                                                                                                                                                                                                                                                                                                                                                                                                                                                                                                                                                                                                                                                                                                                                                                                                                                                                                                                                                                                                                                                                                                                                                                                                                                                                                                                                                                                                         |
|---|------------------------------------------------------------------------------------------------------------------------------------------------------------------------------------------------------------------------------------------------------------------------------------------------|-------------------------------------------------------------------------------------------------------------------------------------------------------------------------------------------------------------------------------------------------------------------------------------------------------------------------------------------------------------------------------------------------------------------------------------------------------------------------------------------------------------------------------------------------------------------------------------------------------------------------------------------------------------------------------------------------------------------------------------------------------------------------------------------------------------------------------------------------------------------------------------------------------------------------------------------------------------------------------------------------------------------------------------------------------------------------------------------------------------------------------------------------------------------------------------------------------------------------------------------------------------------------------------------------------------------------------------------------------------------------------------------------------------------------------------------------------------------------------------------------------------------------------------------------------------------------------------------------------------------------------------------------------------------------------------------------------------------------------------------------------------------------------------------------------------------------------------------------------------------------------------------------------------------------------------------------------------------------------------------------------------------------------------------------------------------------------------------------------------------------------------------------------------------------|
| 2 | <p>The description of proposed model needs more details. Do the observations from all stations or one station is considered to develop the model? Where is the procedure for cycle slip detection by the model and what are the elements that considered to construct the design matrix A.</p> | <p>We estimate the ionospheric delays separately of each station. Moreover, we use ten case studies in different regions all over world in order to evaluate the effectiveness of our proposed software.</p> <p>Melbourne-Wübbena Linear Combination of dual-band phase and code observables was used for detecting and repairing cycle slips in this current study as follows [Melbourne, 1985]:</p> $L_6 = \lambda_{WL} N_{WL}$ $N_{WL} = (\Phi_1 - \Phi_2) - \frac{1}{\lambda_{WL}(f_1 + f_2)} (f_1 P_1 - f_2 P_2)$ <p>The elements that construct the design matrix A are as shown in Eq (2): <math>(1 - \gamma)MF</math>, <math>(1 - \gamma)MF (\phi_P - \phi_0)</math> and <math>(1 - \gamma)MF (\lambda_P - \lambda_0)</math></p>                                                                                                                                                                                                                                                                                                                                                                                                                                                                                                                                                                                                                                                                                                                                                                                                                                                                                                                                                                                                                                                                                                                                                                                                                                                                                                                                                                                                                                |
| 3 | <p>How the equation (10) elements are considered from the previous equations and you are considering sequential least-squares (least-squares) for solving the unknowns and in equation (11) weight matrix is considered.</p>                                                                   | <p>In Equation (11): L1 and L2 are the vectors of the first and the second groups of observations, respectively, <math>A_1</math> and <math>A_2</math> are the design matrices of the first and the second groups of observations, respectively, <math>P_1</math> and <math>P_2</math> are the weight matrices of the first and the second groups of observations, respectively, and <math>X</math> is the unknown parameters vector.</p> <p><b>More details:</b><br/>are discussed in pages 189-190 in the following reference:</p> <p><b>Guochang Xu. (2007), "GPS Theory, Algorithms and Applications", Library of Congress Control Number: 2007929855. ISBN second edition 978-3-540-72714-9 Springer Berlin Heidelberg New York.</b></p> <div style="border: 1px solid black; padding: 5px;"> <p>7.2.1<br/><i>Least Squares Adjustment with Sequential Observation Groups</i></p> <p>Suppose one has two sequential observation equation systems</p> <math display="block">V_1 = L_1 - A_1 X \quad \text{and} \quad (7.11)</math> <math display="block">V_2 = L_2 - A_2 X, \quad (7.12)</math> <p>with weight matrices <math>P_1</math> and <math>P_2</math>. These two equation systems are uncorrelated or independent and have the common unknown vector <math>X</math>. The combined problem can be represented as</p> <math display="block">\begin{pmatrix} V_1 \\ V_2 \end{pmatrix} = \begin{pmatrix} L_1 \\ L_2 \end{pmatrix} - \begin{pmatrix} A_1 \\ A_2 \end{pmatrix} X \quad \text{and} \quad P = \begin{pmatrix} P_1 &amp; 0 \\ 0 &amp; P_2 \end{pmatrix}. \quad (7.13)</math> <p>The least squares normal equation can be formed then as</p> <math display="block">\begin{pmatrix} A_1^T &amp; A_2^T \\ 0 &amp; 0 \end{pmatrix} \begin{pmatrix} P_1 &amp; 0 \\ 0 &amp; P_2 \end{pmatrix} \begin{pmatrix} A_1 \\ A_2 \end{pmatrix} X = \begin{pmatrix} A_1^T &amp; A_2^T \\ 0 &amp; 0 \end{pmatrix} \begin{pmatrix} P_1 &amp; 0 \\ 0 &amp; P_2 \end{pmatrix} \begin{pmatrix} L_1 \\ L_2 \end{pmatrix}</math> <p>The solution is then</p> <math display="block">X = (A_1^T P_1 A_1 + A_2^T P_2 A_2)^{-1} (A_1^T P_1 L_1 + A_2^T P_2 L_2).</math> </div> |

|   |                                                                                                                                                                                                                                                                                           |                                                                                                                                                                                                                                                                                                                                                                                      |
|---|-------------------------------------------------------------------------------------------------------------------------------------------------------------------------------------------------------------------------------------------------------------------------------------------|--------------------------------------------------------------------------------------------------------------------------------------------------------------------------------------------------------------------------------------------------------------------------------------------------------------------------------------------------------------------------------------|
| 4 | Regarding Figures, there is no explanation is given except figure description in once sentence                                                                                                                                                                                            | A brief explanation of the results is mentioned in the line 162. Moreover, table (1) summarizes all the figures.                                                                                                                                                                                                                                                                     |
| 5 | VIDE program means what, VIDE program suddenly come in to figures, from my observation VIDE program means proposed Code                                                                                                                                                                   | Considered: (VIDE) is “Vertical Ionosphere Delay Estimation” which refers to the name of the new proposed software that was developed using MATLAB®.                                                                                                                                                                                                                                 |
| 6 | The average Ionospheric Delay of each station of DOY 3, 2018 using the Proposed code is higher when compared to GAPS expect the locations of HERS, HRAO, MAT1 and METS. How the proposed model better than GAPS. Though you consider estimate the ionospheric delays each thirty seconds. | Because, it is the average through 24 hours. Moreover, this difference is high in the first epochs, then it is reduced gradually due to iterations using sequential least square method.<br><br>In addition, at the end of the day, the results of the ionospheric delay are almost the same.<br><br>Moreover, the standard deviation of results will be added in the revised paper. |

## **2- Minor:**

| No. | Reviewer' comments                                                                                                                             | Authors' Responses                                                                                                                                                                                                                                   |
|-----|------------------------------------------------------------------------------------------------------------------------------------------------|------------------------------------------------------------------------------------------------------------------------------------------------------------------------------------------------------------------------------------------------------|
| 1   | Mention the web addresses or corresponding sources of the GAPS model.                                                                          | <a href="http://gaps.gge.unb.ca/submitadvanced.php">http://gaps.gge.unb.ca/submitadvanced.php</a>                                                                                                                                                    |
| 2   | When comparing observations and mode for several storms, it is needed to mention the station name at least in figures for quick understanding. | The station name is already mentioned below each figure.                                                                                                                                                                                             |
| 3   | There are several minor typo and English mistakes. Example aberrate the terms, GPS, DOY, VIDE. Some time you are using Doy instead of DOY.     | Considered, it will be corrected in the revised paper.<br>DOY refers to “Day of Year”<br><br>VIDE is “Vertical Ionosphere Delay Estimation” which refers to the name of the new proposed software.<br><br>GPS refers to “Global Positioning System”. |

| 4              | <p>In Figure 2: IGS station latitude and longitude not clearly visible. First mention the station station after use the station IDs</p> | <table border="1"> <thead> <tr> <th data-bbox="1272 153 1485 217"><b>Station</b></th> <th data-bbox="1485 153 1686 217"><b>Longitude</b></th> <th data-bbox="1686 153 1951 217"><b>Latitude</b></th> </tr> </thead> <tbody> <tr> <td data-bbox="1272 217 1485 280"><b>ALG3</b></td> <td data-bbox="1485 217 1686 280">-78.0727 °</td> <td data-bbox="1686 217 1951 280">45.9548 °</td> </tr> <tr> <td data-bbox="1272 280 1485 344"><b>CEBER</b></td> <td data-bbox="1485 280 1686 344">-4.3679 °</td> <td data-bbox="1686 280 1951 344">40.4534 °</td> </tr> <tr> <td data-bbox="1272 344 1485 408"><b>FRDN</b></td> <td data-bbox="1485 344 1686 408">-66.6599 °</td> <td data-bbox="1686 344 1951 408">45.9335 °</td> </tr> <tr> <td data-bbox="1272 408 1485 472"><b>HERS</b></td> <td data-bbox="1485 408 1686 472">50.8673°</td> <td data-bbox="1686 408 1951 472">0.3363°</td> </tr> <tr> <td data-bbox="1272 472 1485 536"><b>HRAO</b></td> <td data-bbox="1485 472 1686 536">27.6870 °</td> <td data-bbox="1686 472 1951 536">- 25.8901 °</td> </tr> <tr> <td data-bbox="1272 536 1485 600"><b>HUEG</b></td> <td data-bbox="1485 536 1686 600">7.5962 °</td> <td data-bbox="1686 536 1951 600">47.8340 °</td> </tr> <tr> <td data-bbox="1272 600 1485 663"><b>MADR</b></td> <td data-bbox="1485 600 1686 663">-4.2497 °</td> <td data-bbox="1686 600 1951 663">40.4292 °</td> </tr> <tr> <td data-bbox="1272 663 1485 727"><b>MAT1</b></td> <td data-bbox="1485 663 1686 727">16.7045 °</td> <td data-bbox="1686 663 1951 727">40.6491 °</td> </tr> <tr> <td data-bbox="1272 727 1485 791"><b>METS</b></td> <td data-bbox="1485 727 1686 791">24.3953 °</td> <td data-bbox="1686 727 1951 791">60.2175 °</td> </tr> <tr> <td data-bbox="1272 791 1485 917"><b>NRC1</b></td> <td data-bbox="1485 791 1686 917">- 75.6238 °</td> <td data-bbox="1686 791 1951 917">45.4542 °</td> </tr> </tbody> </table> | <b>Station</b> | <b>Longitude</b> | <b>Latitude</b> | <b>ALG3</b> | -78.0727 ° | 45.9548 ° | <b>CEBER</b> | -4.3679 ° | 40.4534 ° | <b>FRDN</b> | -66.6599 ° | 45.9335 ° | <b>HERS</b> | 50.8673° | 0.3363° | <b>HRAO</b> | 27.6870 ° | - 25.8901 ° | <b>HUEG</b> | 7.5962 ° | 47.8340 ° | <b>MADR</b> | -4.2497 ° | 40.4292 ° | <b>MAT1</b> | 16.7045 ° | 40.6491 ° | <b>METS</b> | 24.3953 ° | 60.2175 ° | <b>NRC1</b> | - 75.6238 ° | 45.4542 ° |
|----------------|-----------------------------------------------------------------------------------------------------------------------------------------|------------------------------------------------------------------------------------------------------------------------------------------------------------------------------------------------------------------------------------------------------------------------------------------------------------------------------------------------------------------------------------------------------------------------------------------------------------------------------------------------------------------------------------------------------------------------------------------------------------------------------------------------------------------------------------------------------------------------------------------------------------------------------------------------------------------------------------------------------------------------------------------------------------------------------------------------------------------------------------------------------------------------------------------------------------------------------------------------------------------------------------------------------------------------------------------------------------------------------------------------------------------------------------------------------------------------------------------------------------------------------------------------------------------------------------------------------------------------------------------------------------------------------------------------------------------------------------------------------------------------------------------------------------------------------------------------------------------------------------------------------------------------------------------------------------------------------------------------------------------------------------------------------------------|----------------|------------------|-----------------|-------------|------------|-----------|--------------|-----------|-----------|-------------|------------|-----------|-------------|----------|---------|-------------|-----------|-------------|-------------|----------|-----------|-------------|-----------|-----------|-------------|-----------|-----------|-------------|-----------|-----------|-------------|-------------|-----------|
| <b>Station</b> | <b>Longitude</b>                                                                                                                        | <b>Latitude</b>                                                                                                                                                                                                                                                                                                                                                                                                                                                                                                                                                                                                                                                                                                                                                                                                                                                                                                                                                                                                                                                                                                                                                                                                                                                                                                                                                                                                                                                                                                                                                                                                                                                                                                                                                                                                                                                                                                  |                |                  |                 |             |            |           |              |           |           |             |            |           |             |          |         |             |           |             |             |          |           |             |           |           |             |           |           |             |           |           |             |             |           |
| <b>ALG3</b>    | -78.0727 °                                                                                                                              | 45.9548 °                                                                                                                                                                                                                                                                                                                                                                                                                                                                                                                                                                                                                                                                                                                                                                                                                                                                                                                                                                                                                                                                                                                                                                                                                                                                                                                                                                                                                                                                                                                                                                                                                                                                                                                                                                                                                                                                                                        |                |                  |                 |             |            |           |              |           |           |             |            |           |             |          |         |             |           |             |             |          |           |             |           |           |             |           |           |             |           |           |             |             |           |
| <b>CEBER</b>   | -4.3679 °                                                                                                                               | 40.4534 °                                                                                                                                                                                                                                                                                                                                                                                                                                                                                                                                                                                                                                                                                                                                                                                                                                                                                                                                                                                                                                                                                                                                                                                                                                                                                                                                                                                                                                                                                                                                                                                                                                                                                                                                                                                                                                                                                                        |                |                  |                 |             |            |           |              |           |           |             |            |           |             |          |         |             |           |             |             |          |           |             |           |           |             |           |           |             |           |           |             |             |           |
| <b>FRDN</b>    | -66.6599 °                                                                                                                              | 45.9335 °                                                                                                                                                                                                                                                                                                                                                                                                                                                                                                                                                                                                                                                                                                                                                                                                                                                                                                                                                                                                                                                                                                                                                                                                                                                                                                                                                                                                                                                                                                                                                                                                                                                                                                                                                                                                                                                                                                        |                |                  |                 |             |            |           |              |           |           |             |            |           |             |          |         |             |           |             |             |          |           |             |           |           |             |           |           |             |           |           |             |             |           |
| <b>HERS</b>    | 50.8673°                                                                                                                                | 0.3363°                                                                                                                                                                                                                                                                                                                                                                                                                                                                                                                                                                                                                                                                                                                                                                                                                                                                                                                                                                                                                                                                                                                                                                                                                                                                                                                                                                                                                                                                                                                                                                                                                                                                                                                                                                                                                                                                                                          |                |                  |                 |             |            |           |              |           |           |             |            |           |             |          |         |             |           |             |             |          |           |             |           |           |             |           |           |             |           |           |             |             |           |
| <b>HRAO</b>    | 27.6870 °                                                                                                                               | - 25.8901 °                                                                                                                                                                                                                                                                                                                                                                                                                                                                                                                                                                                                                                                                                                                                                                                                                                                                                                                                                                                                                                                                                                                                                                                                                                                                                                                                                                                                                                                                                                                                                                                                                                                                                                                                                                                                                                                                                                      |                |                  |                 |             |            |           |              |           |           |             |            |           |             |          |         |             |           |             |             |          |           |             |           |           |             |           |           |             |           |           |             |             |           |
| <b>HUEG</b>    | 7.5962 °                                                                                                                                | 47.8340 °                                                                                                                                                                                                                                                                                                                                                                                                                                                                                                                                                                                                                                                                                                                                                                                                                                                                                                                                                                                                                                                                                                                                                                                                                                                                                                                                                                                                                                                                                                                                                                                                                                                                                                                                                                                                                                                                                                        |                |                  |                 |             |            |           |              |           |           |             |            |           |             |          |         |             |           |             |             |          |           |             |           |           |             |           |           |             |           |           |             |             |           |
| <b>MADR</b>    | -4.2497 °                                                                                                                               | 40.4292 °                                                                                                                                                                                                                                                                                                                                                                                                                                                                                                                                                                                                                                                                                                                                                                                                                                                                                                                                                                                                                                                                                                                                                                                                                                                                                                                                                                                                                                                                                                                                                                                                                                                                                                                                                                                                                                                                                                        |                |                  |                 |             |            |           |              |           |           |             |            |           |             |          |         |             |           |             |             |          |           |             |           |           |             |           |           |             |           |           |             |             |           |
| <b>MAT1</b>    | 16.7045 °                                                                                                                               | 40.6491 °                                                                                                                                                                                                                                                                                                                                                                                                                                                                                                                                                                                                                                                                                                                                                                                                                                                                                                                                                                                                                                                                                                                                                                                                                                                                                                                                                                                                                                                                                                                                                                                                                                                                                                                                                                                                                                                                                                        |                |                  |                 |             |            |           |              |           |           |             |            |           |             |          |         |             |           |             |             |          |           |             |           |           |             |           |           |             |           |           |             |             |           |
| <b>METS</b>    | 24.3953 °                                                                                                                               | 60.2175 °                                                                                                                                                                                                                                                                                                                                                                                                                                                                                                                                                                                                                                                                                                                                                                                                                                                                                                                                                                                                                                                                                                                                                                                                                                                                                                                                                                                                                                                                                                                                                                                                                                                                                                                                                                                                                                                                                                        |                |                  |                 |             |            |           |              |           |           |             |            |           |             |          |         |             |           |             |             |          |           |             |           |           |             |           |           |             |           |           |             |             |           |
| <b>NRC1</b>    | - 75.6238 °                                                                                                                             | 45.4542 °                                                                                                                                                                                                                                                                                                                                                                                                                                                                                                                                                                                                                                                                                                                                                                                                                                                                                                                                                                                                                                                                                                                                                                                                                                                                                                                                                                                                                                                                                                                                                                                                                                                                                                                                                                                                                                                                                                        |                |                  |                 |             |            |           |              |           |           |             |            |           |             |          |         |             |           |             |             |          |           |             |           |           |             |           |           |             |           |           |             |             |           |
| 5              | <p>In page 1 Line 15 “the ionospheric delay” the “T” must be the capital letter.</p>                                                    | <p>Considered, it will be corrected in the revised paper.</p>                                                                                                                                                                                                                                                                                                                                                                                                                                                                                                                                                                                                                                                                                                                                                                                                                                                                                                                                                                                                                                                                                                                                                                                                                                                                                                                                                                                                                                                                                                                                                                                                                                                                                                                                                                                                                                                    |                |                  |                 |             |            |           |              |           |           |             |            |           |             |          |         |             |           |             |             |          |           |             |           |           |             |           |           |             |           |           |             |             |           |
